# Supplementary material for: Fluorescent Polyion Complex for the Detection of Sodium Dodecylbenzenesulfonate
Source: PubMed Central journal article supplement (PMC6404151; doi:10.3390/polym10060657), 2018-06-12
Supplement: polymers-10-00657-s001.pdf [file polymers-10-00657-s001.pdf]

*Article*

# **Fluorescent Polyion Complex for Detection of Sodium Dodecylbenzenesulfonate**

**Shuai Liu <sup>1</sup>, Cun Hu <sup>1</sup>, Jianbin Huang <sup>2</sup> and Yun Yan <sup>2,\*</sup>**

<sup>1</sup> College of Chemistry and Chemical Engineering, Southwest Petroleum University, Chengdu, 610500, China; 201599010093@swpu.edu.cn (S.L.); 201621000202@stu.swpu.edu.cn (C.H.)

<sup>2</sup> Beijing National Laboratory for Molecular Sciences, Institution College of Chemistry and Molecular Engineering, Peking University, Beijing, 100871, China; jbhuang@pku.edu.cn (J.H.)

\* Correspondence: yunyan@pku.edu.cn (Y.Y.); Tel.: 86-010-6276-5058

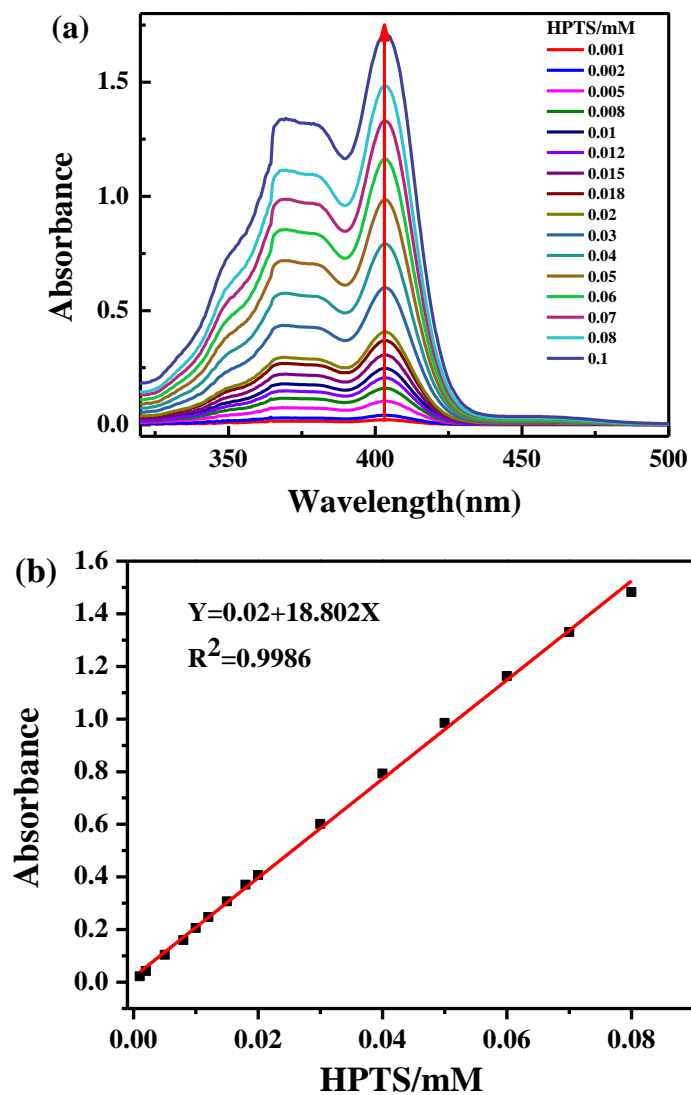

**Figure S1.** (a) UV-vis absorption spectra of HPTS solutions with varies concentration. (b) The maximum absorption at 403 nm of HPTS solutions with varies concentration.  $R=0.9986$ .

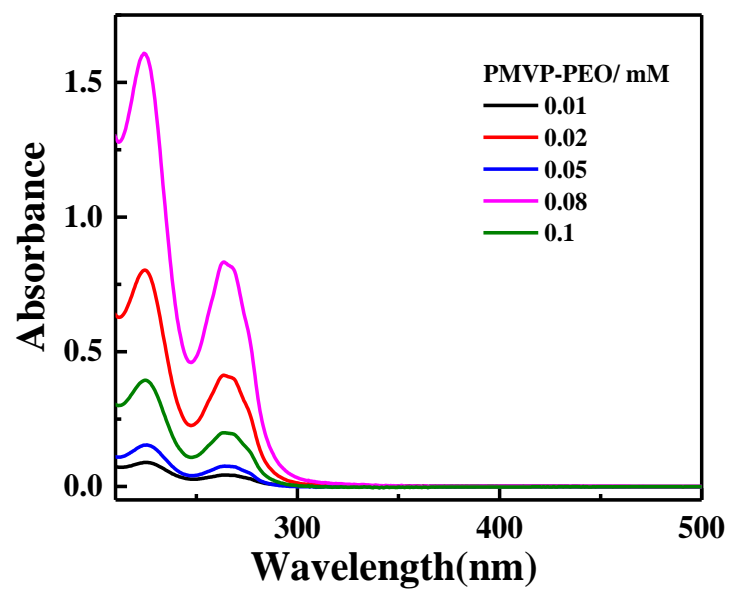

**Figure S2.** Absorption spectra of different concentrations PMVP<sub>41-b</sub>-PEO<sub>205</sub> in water. PMVP-PEO is the abbreviation of PMVP<sub>41-b</sub>-PEO<sub>205</sub>.

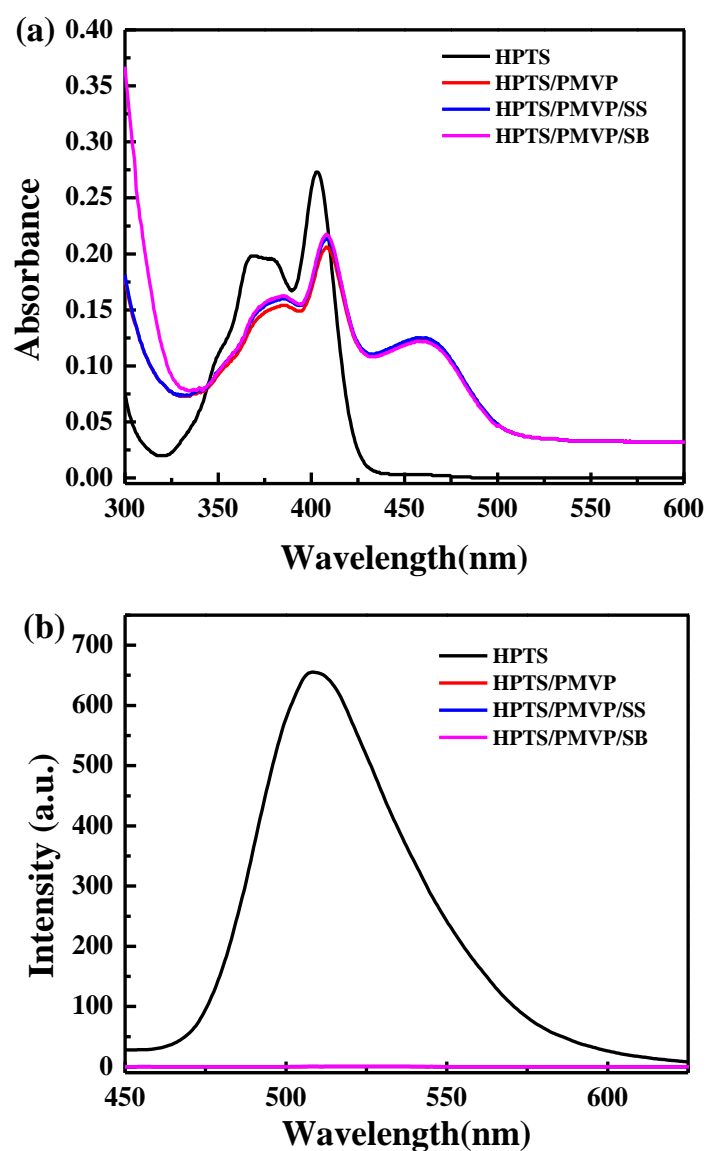

**Figure S3.** (a) Absorption and (b) Emission spectra of HPTS, HPTS/PMVP-PEO, HPTS/PMVP/SS, HPTS/PMVP/SB. [HPTS] = 0.05 mM, [PMVP] = 0.4 mM, [SS] = [SB] = 0.2 mM. PMVP, SS, SB is the abbreviation of PMVP<sub>41-*b*</sub>-PEO<sub>205</sub>, sodium salicylate, Sodium benzoate, respectively.
